# Supplementary material for: One-pot synthesis of BiSbO4 nanophotocatalyst with enhanced visible-light performance
Source: Royal Society of Chemistry journal article supplement (doi:10.1039/c1ce05025g), 2011-01-01
Supplement: c1ce05025g.pdf [file c1ce05025g.pdf]

# One-Pot Synthesis of BiSbO<sub>4</sub> Nanophotocatalyst with Enhanced Visible-Light Performance

Jianjun Wu,<sup>a, b</sup> Fuqiang Huang,<sup>\*a, b</sup> Xujie Lü<sup>a, b</sup> and Ping Chen<sup>a, b</sup>

<sup>a</sup> State Key Laboratory of High Performance Ceramics and Superfine Microstructures, Shanghai Institute of Ceramics, Chinese Academy of Sciences, Shanghai 200050, P. R. China. Tel/Fax: +86 21 5241 6360, E-mail: [huangfq@mail.sic.ac.cn](mailto:huangfq@mail.sic.ac.cn)

<sup>b</sup> College of Chemistry and Molecular Engineering, Peking University, Beijing 100871, P.R. China.

## 1. XRD characterization on HT-BiSbO<sub>4</sub>

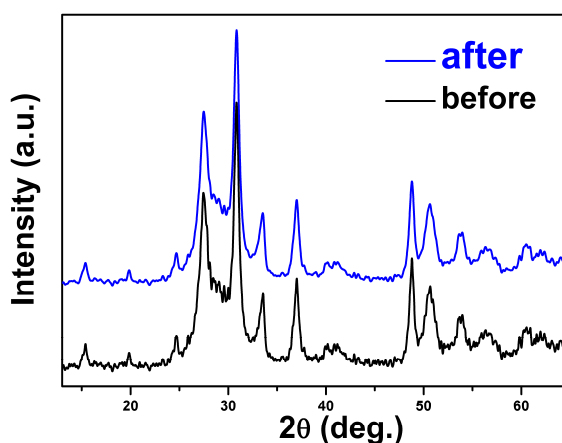

Figure S1 XRD pattern for HT-BiSbO<sub>4</sub> before and after the photocatalysis test.

## 2. Related characterization on commercial Bi<sub>2</sub>O<sub>3</sub>

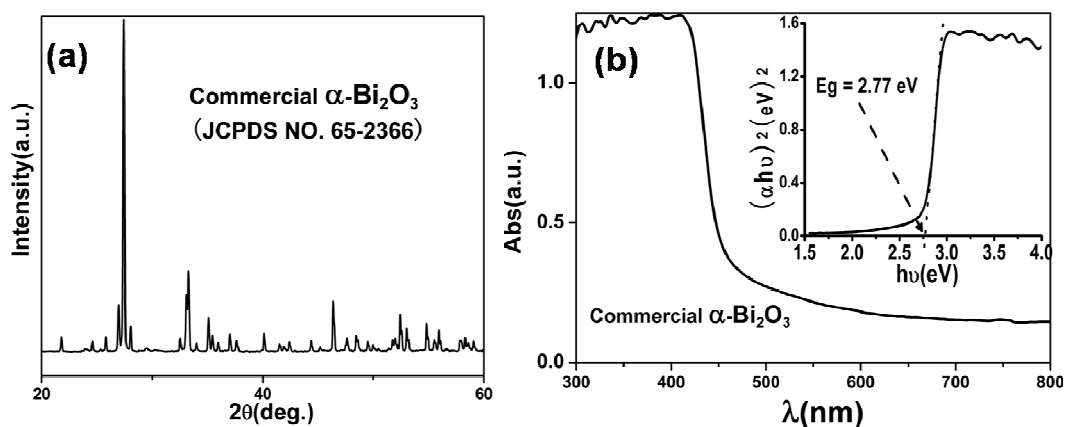

Figure S2 (a) XRD pattern and (b) UV-Vis spectrum for commercial Bi<sub>2</sub>O<sub>3</sub>.

### 3. The surface adsorption data of the photocatalysts

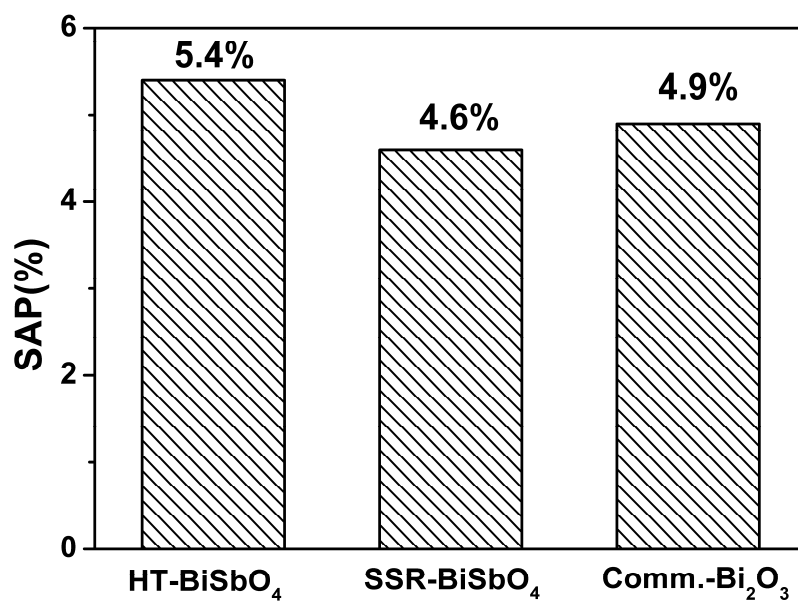

Figure S3  $SAP = (C_0 - C)/C_0 * 100\%$ , where  $C_0$  is the initial MO concentration and  $C$  is the concentration after 10 h adsorption.
